# Supplementary material
Source: PubMed Central journal article supplement (PMC5777868)
Supplement: NIHMS925085-supplement-Supp_info.pdf [file NIHMS925085-supplement-Supp_info.pdf]

Supplemental Information  
For  
*VapA of Rhodococcus equi* Binds Phosphatidic Acid

Lindsay M. Wright<sup>1</sup>, Emily M. Carpinone<sup>2</sup>, Terry L. Bennett<sup>2</sup>, Mary K. Hondalus<sup>1</sup>, and Vincent J. Starai<sup>1,2\*</sup>

<sup>1</sup>Department of Infectious Diseases, University of Georgia, Athens, GA 30602

<sup>2</sup>Department of Microbiology, University of Georgia, Athens, GA 30602

\*Corresponding Author:

Departments of Microbiology and Infectious Diseases

University of Georgia

Athens, GA 30602

[vjstarai@uga.edu](mailto:vjstarai@uga.edu); telephone: 706-542-5755; fax: 706-542-2674

Keywords: *R. equi*, host-pathogen interactions, macrophage, phosphatidic acid, protein:lipid interaction

**Table S1. Plasmids used in this study.**

| <b>Plasmids</b>              | <b>Description</b>                                        | <b>Source</b>                               |
|------------------------------|-----------------------------------------------------------|---------------------------------------------|
| pHis-Parallel1               | N-terminal His tag expression vector; Carb <sup>R</sup>   | (Sheffield et al., 1999)                    |
| pGO35                        | yeast N-terminal GFP fusion expression plasmid            | (Burd and Emr, 1998; Odorizzi et al., 1998) |
| pVapALMW                     | <i>vapA</i> (94-567) in pHis-Parallel1; Carb <sup>R</sup> | This Study                                  |
| pVapGLMW                     | <i>vapG</i> in pHis-Parallel1; Carb <sup>R</sup>          | This Study                                  |
| pVapBLMW                     | <i>vapB</i> in pHis-Parallel1; Carb <sup>R</sup>          | This Study                                  |
| pVapK2LMW                    | <i>vapK2</i> in pHis-Parallel1; Carb <sup>R</sup>         | This Study                                  |
| pGFP-VapA                    | <i>vapA</i> in pGO35                                      | This Study                                  |
| pGFP-VapA <sup>32-189</sup>  | <i>vapA</i> (94-567) in pGO35                             | This Study                                  |
| pGFP-VapG <sup>27-172</sup>  | <i>vapG</i> (79-519) in pGO35                             | This Study                                  |
| pGFP-VapB <sup>35-197</sup>  | <i>vapB</i> (103-594) in pGO35                            | This Study                                  |
| pGFP-VapK2 <sup>32-202</sup> | <i>vapK2</i> (94-609) in pGO35                            | This Study                                  |
| pGFPmut2                     | constitutive GFP expression plasmid; Hyg <sup>R</sup>     | (Burton et al., 2015)                       |

**Table S2. Primers used in this study.**

| Name                   | Sequence <sup>1</sup>                                                | Plasmid Generated                          |
|------------------------|----------------------------------------------------------------------|--------------------------------------------|
| VapA F (BamHI)         | 5'-GTAGGATCCGACCGTTCTTGATTCCGGTAG-3'                                 | pVapALMW                                   |
| VapA R (Sall)          | 5'-CTAGTCGACCCGGAAGTACGTGCAG-3'                                      | pVapALMW                                   |
| VapG F (EcoRI)         | 5'-GAATTCGCGGAACTTCAATGGTATCCAC-3'                                   | pVapGLMW                                   |
| VapG R (SpeI)          | 5'-CTTACTAGTGTGAGTGCGCCGTCC-3'                                       | pVapGLMW                                   |
| VapB F (EcoRI)         | 5'-GTTGAATTCGCGGCTGTGCTGGATTCC-3'                                    | pVapBLMW                                   |
| VapB R (Sall)          | 5'-CATGTCGACCTATGCGTTATGCAACCTC-3'                                   | pVapBLMW                                   |
| VapK2 F (EcoRI)        | 5'-GTTGAATTCGAACCGCTGGACGTTG -3'                                     | pVapK2LMW                                  |
| VapK2 R (SpeI)         | 5'-CCTACTAGTCGAACGTTATGTTCCGCC-3'                                    | pVapK2LMW                                  |
| GFP-VapA NSS F (BglII) | 5'-ATGGATGAACTATAACAAGTCCGGACTC<br>AGATCTATGACCGTTCTTGATTCCGGTAGC-3' | pGFP-VapA <sup>32-189</sup>                |
| GFP-VapA SS F (BglII)  | 5'-ATGGATGAACTATAACAAGTCCGGACT<br>CAGATCTATGGTGAAGACTCTTCACAAGAC-3'  | pGFP-VapA                                  |
| GFP-VapA R (BglII)     | 5'-GTCGACTGCAGAATTCGAAGCTTGAG<br>CTCGAGATCTCTAGGCGTTGTGCCAGCTAC-3'   | pGFP-VapA <sup>32-189</sup> ,<br>pGFP-VapA |
| GFP-VapG NSS F (BglII) | 5'-ATGGATGAACTATAACAAGTCCGGACTC<br>AGATCTATGGGAACTTCAATGGTATCCAC-3'  | pGFP-VapG <sup>27-172</sup>                |
| GFP-VapG R (BglII)     | 5'-GTCGACTGCAGAATTCGAAGCTTGA<br>GCTCGAGATCTCTATTGCCACCCTCCGGTTC-3'   | pGFP-VapG <sup>27-172</sup>                |
| GFP-VapB NSS F (BglII) | 5'-ATGGATGAACTATAACAAGTCCGGACT<br>CAGATCTATGGCTGTGCTGGATTCCGGAGGC-3' | pGFP-VapB <sup>35-197</sup>                |
| GFP-VapB R (BglII)     | 5'-GTCGACTGCAGAATTCGAAGCTTGAGC<br>TCGAGATCTCTATTATGCAACCTCCCAGTTG-3' | pGFP-VapB <sup>35-197</sup>                |



## References

Burd, C. G. and S. D. Emr (1998). Phosphatidylinositol(3)-phosphate signaling mediated by specific binding to RING FYVE domains. *Mol Cell* 2, 157-162.

Burton, A.J., Giguere, S., Berghaus, L.J., Hondalus, M.K., and Arnold, R.D. (2015). Efficacy of liposomal gentamicin against *Rhodococcus equi* in a mouse infection model and colocalization with *R. equi* in equine alveolar macrophages. *Vet Microbiol* 176, 292-300.

Odorizzi, G., M. Babst and S. D. Emr (1998). Fab1p PtdIns(3)P 5-kinase function essential for protein sorting in the multivesicular body. *Cell* 95, 847-858.

Sheffield, P., S. Garrard and Z. Derewenda (1999). Overcoming expression and purification problems of RhoGDI using a family of "parallel" expression vectors. *Protein Expr Purif* 15, 34-39.

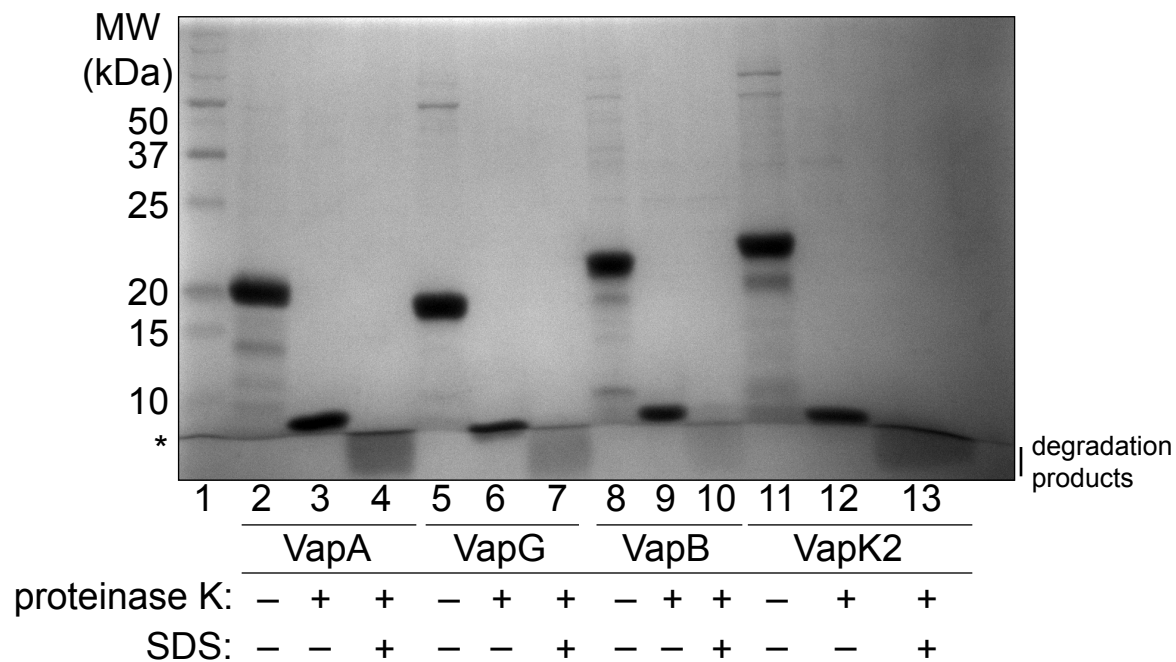

**Figure S1. Proteinase K digestion of each recombinant Vap shows a stable protein core.** 3  $\mu$ g of indicated recombinant Vap protein was incubated with or without Proteinase K (500:1 protein:Proteinase K molar ratio) and, where indicated, 1% SDS for 75 min at 37  $^{\circ}$ C. Reactions were separated via SDS-PAGE and stained with Coomassie Brilliant Blue. The asterisk (\*) indicates the dye front of the gel.
